# Supplementary material for: CdIn2S4 microspheres embedded with mesoporous Zn-doped g-C3N4 ultrathin nanosheets for efficient photocatalytic hydrogen evolution
Source: Royal Society of Chemistry journal article supplement (doi:10.1039/d3nj05590f), 2024-01-01
Supplement: d3nj05590f1.pdf [file d3nj05590f1.pdf]

CdIn<sub>2</sub>S<sub>4</sub> microspheres embedded with mesoporous Zn-doped g-C<sub>3</sub>N<sub>4</sub> ultrathin nanosheets for efficient photocatalytic hydrogen evolution and reduction of.

Shaopeng Tian <sup>a\*</sup>, Huaping Ren <sup>a</sup>, Wuge Sun <sup>a</sup>, Yixuan Song <sup>a</sup>, Hang Ge <sup>a</sup>, Anye Yang<sup>a</sup>, Weilong Zheng <sup>a</sup>, Yuzhen Zhao <sup>a</sup>

(a Xi'an Key Laboratory of Advanced Photo-electronics Materials and Energy Conversion Device, School of Electronic Information, Xijing University, Xi'an, Shaanxi 710123, China)

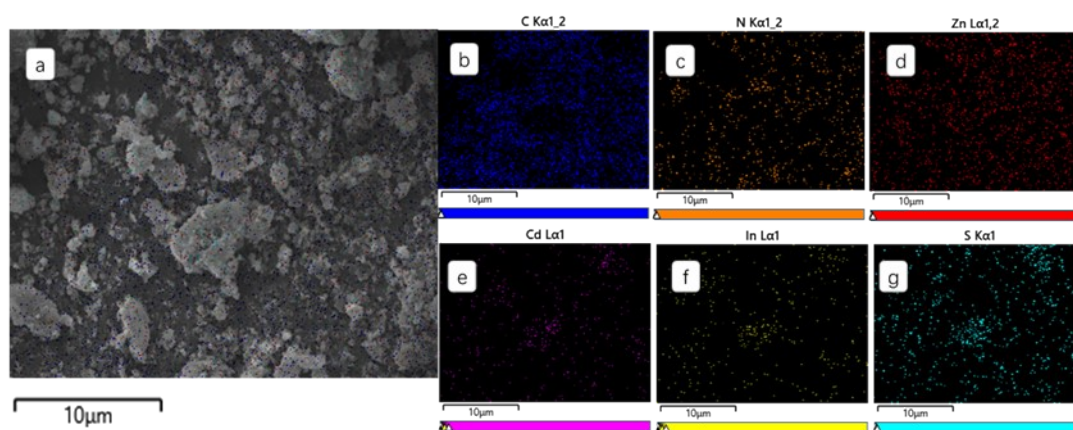

**Fig. S1.** (a) SEM images of CdIn<sub>2</sub>S<sub>4</sub>/Zn-g-C<sub>3</sub>N<sub>4</sub> nanocomposite, and the spatially resolved elemental maps of CdIn<sub>2</sub>S<sub>4</sub>/Zn-g-C<sub>3</sub>N<sub>4</sub> sample containing (b) C, (c) N, (d) Zn, (e) Cd, (f) In and (g) S elements.

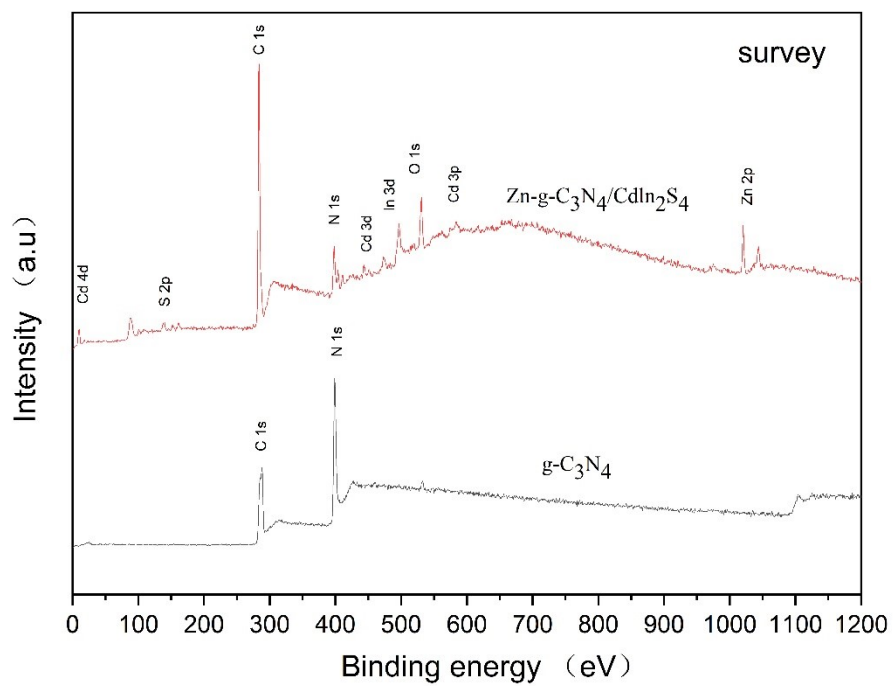

**Fig. S2** The survey XPS spectra of CdIn<sub>2</sub>S<sub>4</sub>/Zn-g-C<sub>3</sub>N<sub>4</sub> nanocomposite.
